# Supplementary material for: Membrane properties and anti-bacterial/anti-biofouling activity of polysulfone–graphene oxide composite membranes phase inversed in graphene oxide non-solvent
Source: Royal Society of Chemistry journal article supplement (doi:10.1039/c6ra25015g), 2017-01-01
Supplement: c6ra25015g1.pdf [file c6ra25015g1.pdf]

## Membrane properties and anti-bacterial/anti-biofouling activity of polysulfone-graphene oxide composite membranes phase inverted in graphene oxide non-solvent

V.R.S.S. Mokkalapati<sup>1#</sup>, Derya Yuksel. Koseoglu Imer<sup>2,3</sup>, Nurmiray Yilmaz<sup>4</sup>, Ivan Mijakovic<sup>1</sup>, Ismail Koyuncu<sup>2,3</sup>

### FTIR (Fourier Transform Infrared Spectroscopy)

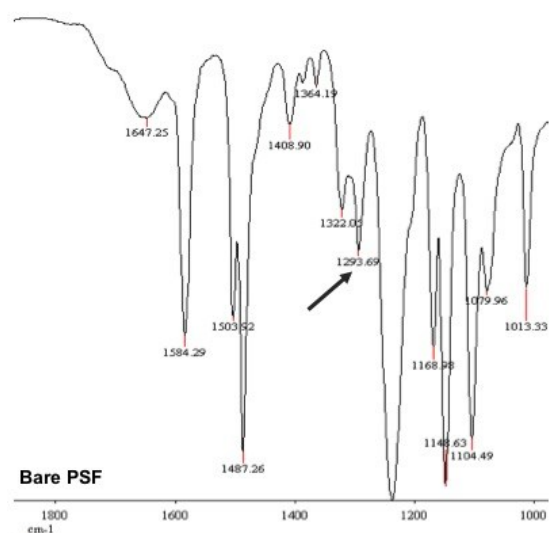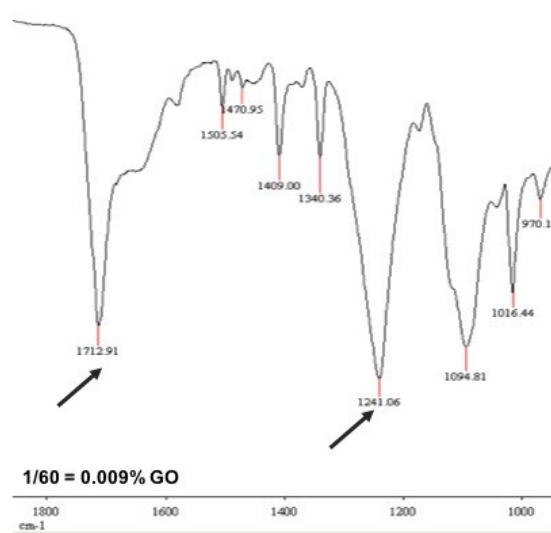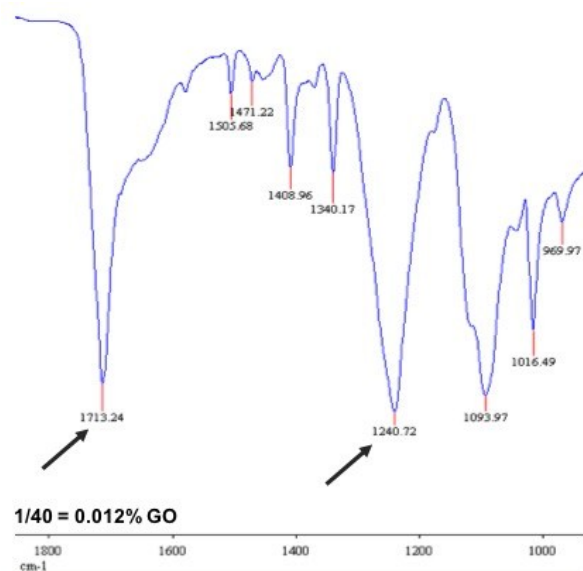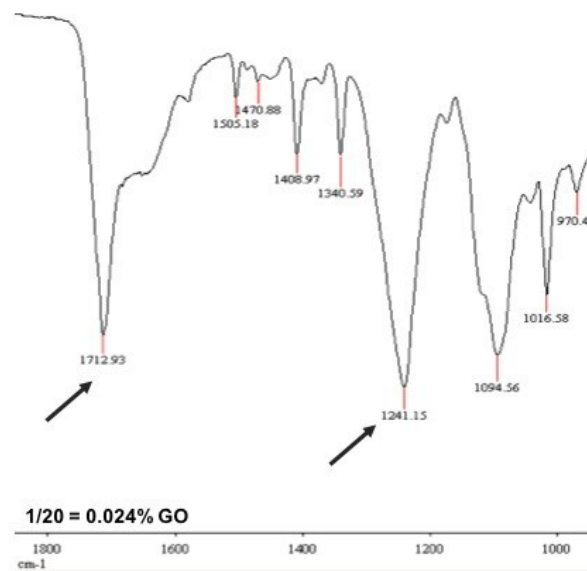

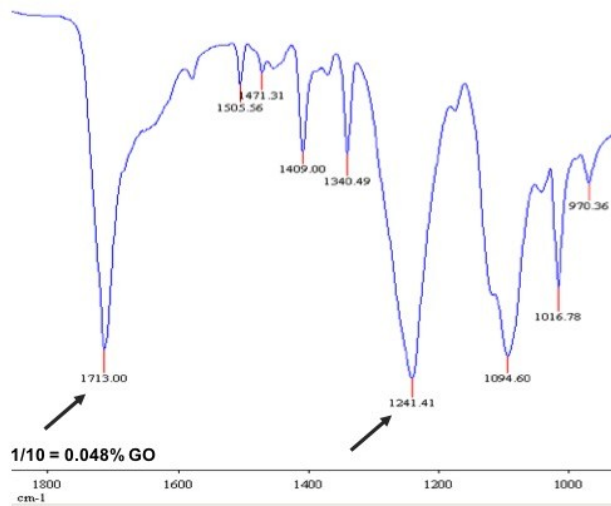

ES 1. FTIR analysis of bare PSF and GO-PSF composite membranes

### Roughness

The roughness values (RMS) of membranes were determined with optic profilometer (Digital Instruments). Before observations, the membranes were dried at room temperature. The membrane samples were fixed on a glass slide and scanned over 10.0  $\mu\text{m} \times 10.0 \mu\text{m}$  area.

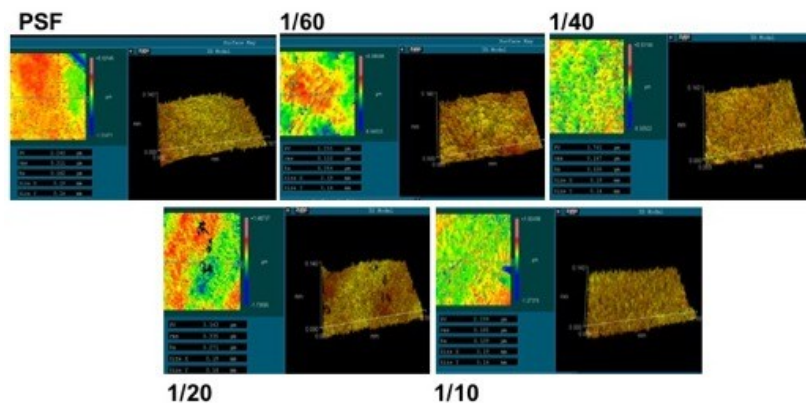

| Membrane type | RMS ( $\mu\text{m}$ ) |
|---------------|-----------------------|
| Bare PSF      | 0.21                  |
| 1/60 GO       | 0.12                  |
| 1/40 GO       | 0.15                  |
| 1/20 GO       | 0.33                  |
| 1/10 GO       | 0.19                  |

ES 2. Roughness measurements of bare PSF and GO-PSF composite membranes
